# Supplementary material for: Characterization of the salivary microbiome in healthy individuals under fatigue status
Source: Front Cell Infect Microbiol. 2025 May 29;15:1506723. doi: 10.3389/fcimb.2025.1506723 (PMC12159056; doi:10.3389/fcimb.2025.1506723)
Supplement: Supplementary file 3 [file Table1.xlsx]

## Sheet: Sheet1
Table S1. Baseline characteristics of study participants, related to Figure 1.
Parameter	ENG group (n=63)	FTG group (n=7)	P value
Female, n (%)	31 (49.2)	4(57.1)	0.695
Age (years)	23.84±8.22	27.29±9.55	0.136
