# Supplementary material for: Characterization of the salivary microbiome in healthy individuals under fatigue status
Source: Front Cell Infect Microbiol. 2025 May 29;15:1506723. doi: 10.3389/fcimb.2025.1506723 (PMC12159056; doi:10.3389/fcimb.2025.1506723)
Supplement: Supplementary file 4 [file Table2.xlsx]

## Sheet: Sheet1
Table S2. Alpha diversity indices of the saliva microbial community, related to Figure 2.
SampleID	ACE	Chao1	Simpson	Shannon	Group
S01	340.985	330.941	0.870568	3.25363	ENG
S02	314.696	310.455	0.881086	3.08259	ENG
S03	490.231	488.632	0.77165	2.90165	ENG
S04	406.976	429.941	0.549339	1.8806	FTG
S05	402.306	420.774	0.85434	2.98504	ENG
S06	416.06	451.118	0.877314	3.13364	ENG
S07	450.477	417.56	0.761543	2.71378	ENG
S08	463.869	522.345	0.819246	2.96315	FTG
S09	441.41	406.936	0.808232	2.93124	ENG
S10	382.759	357.667	0.901697	3.26254	ENG
S11	442.628	441.738	0.89687	3.46094	ENG
S12	383.373	362	0.767039	2.75998	ENG
S13	429.172	474.214	0.823828	2.90602	ENG
S14	476.417	466	0.876418	3.35896	ENG
S15	583.762	600.455	0.849699	3.40581	FTG
S16	454.775	440.526	0.869945	3.20212	ENG
S17	511.384	506.286	0.880356	3.43441	ENG
S18	343.744	364.533	0.617249	2.0008	ENG
S19	382.601	383.941	0.725915	2.44846	ENG
S20	312.489	313.026	0.748695	2.57811	ENG
S21	466.013	459.279	0.811509	2.82654	ENG
S22	416.455	430.405	0.900236	3.24315	ENG
S23	406.962	412.1	0.692442	2.25664	ENG
S24	457.096	466.478	0.765124	2.51781	ENG
S25	411.409	404.696	0.804987	2.83264	ENG
S26	392.03	373.213	0.682681	2.32164	ENG
S27	413.916	420.978	0.702372	2.52025	FTG
S28	366.366	353.65	0.743827	2.61394	ENG
S29	407.125	412.029	0.84694	2.90482	ENG
S30	459.882	469.071	0.877851	3.27817	ENG
S31	416.851	406.273	0.746836	2.63014	ENG
S32	338.69	388.455	0.761906	2.69906	ENG
S33	303.644	304.848	0.788392	2.62601	ENG
S34	337.772	334.758	0.891715	3.20618	ENG
S35	513.096	501.3	0.805111	2.87563	ENG
S36	396.379	365.122	0.658597	2.04204	ENG
S37	379.347	392.278	0.809628	2.95433	ENG
S38	441.388	455.824	0.783777	2.70048	ENG
S39	460.674	455.146	0.688933	2.33043	ENG
S40	387.754	410.03	0.77688	2.67867	ENG
S41	405.173	409.676	0.71087	2.33692	ENG
S42	436.998	424.143	0.791884	2.77909	FTG
S43	402.913	382.766	0.838885	2.78865	ENG
S44	380.057	363.579	0.834879	3.04621	ENG
S45	476.266	436.279	0.779834	2.67395	FTG
S46	425.426	425.692	0.834803	3.15291	ENG
S47	496.97	520.109	0.842681	3.08361	ENG
S48	402.254	390.5	0.784304	2.64141	ENG
S49	402.046	418.125	0.789386	2.62445	ENG
S50	518.163	504.887	0.842369	3.18324	ENG
S51	565.851	547.616	0.87473	3.47325	ENG
S52	439.805	436.357	0.862512	3.00276	ENG
S53	434.578	432.718	0.815652	2.92915	ENG
S54	416.215	366.5	0.72682	2.54313	ENG
S55	360.612	333.278	0.589357	1.89459	FTG
S56	366.624	350.333	0.746002	2.52371	ENG
S57	405.444	418.917	0.876639	3.09444	ENG
S58	417.667	410.833	0.842489	3.07087	ENG
S59	480.164	512.154	0.844587	3.15582	ENG
S60	365.882	383.594	0.742875	2.47326	ENG
S61	419.996	434.278	0.822508	3.11483	ENG
S62	489.512	455.062	0.714096	2.48842	ENG
S63	403.21	424	0.788235	2.3959	ENG
S64	375.155	369.143	0.872758	3.18174	ENG
S65	450.257	470.182	0.749714	2.45648	ENG
S66	347.366	350.387	0.929317	3.53599	ENG
S67	391.526	380.216	0.82739	2.58711	ENG
S68	401.321	375.02	0.67318	2.13585	ENG
S69	445.27	424.667	0.845651	2.81507	ENG
S70	464.904	447.717	0.873939	3.12156	ENG
