# Supplementary material for: Characterization of the salivary microbiome in healthy individuals under fatigue status
Source: Front Cell Infect Microbiol. 2025 May 29;15:1506723. doi: 10.3389/fcimb.2025.1506723 (PMC12159056; doi:10.3389/fcimb.2025.1506723)
Supplement: Supplementary file 5 [file Table3.xlsx]

## Sheet: Sheet1
Table S3. The network topology index, related to Figure 3.
Group	ENG	FTG
num.edges(L)	56	355
num.pos.edges	55	258
num.neg.edges	1	97
num.vertices(n)	28	98
no.clusters	4	2
average.path.length	1.33064	2.89514
diameter	3.12231	7.29001
centralization.betweenness	0.103272	0.0951404
Connectance(edge_density)	0.148148	0.0746897
average.degree(Average K)	4	7.2449
mean.clustering.coefficient(Average.CC)	0.606645	0.506017
centralization.degree	0.259259	0.110877
centralization.closeness	0.818935	1.41544
RM(relative.modularity)	-0.00847836	0.944771
