# Supplementary material for: Characterization of the salivary microbiome in healthy individuals under fatigue status
Source: Front Cell Infect Microbiol. 2025 May 29;15:1506723. doi: 10.3389/fcimb.2025.1506723 (PMC12159056; doi:10.3389/fcimb.2025.1506723)
Supplement: Supplementary file 6 [file Table4.xlsx]

## Sheet: Phylum_level
Order	Phylum	ENG	FTG	P_value	Signif.
1	Firmicutes	67.581	77.9286	0.0057	**
2	Actinobacteria	13.6822	7.87143	0.01382	*
3	Proteobacteria	10.0224	5.70857	0.04975	*
4	Bacteroidetes	5.61079	4.27143	0.5118
5	Fusobacteria	2.01349	2.62	0.3873
6	Candidatus_Saccharibacteria	0.753016	0.815714	0.8371
7	Spirochaetes	0.156508	0.472857	0.02425	*
8	Campilobacterota	0.12619	0.138571	0.7686
9	Tenericutes	0.0242857	0.124286	0.02113	*
10	Synergistetes	0.00904762	0.0171429	0.2094
11	others	0.0211111	0.0314286	-

## Sheet: Genus_level
Order	Genus	FTG	ENG	P_value	Signif.
1	Streptococcus	55.9143	47.4651	0.0155	*
2	Gemella	11.7286	10.5738	0.534
3	Rothia	6.43857	10.914	0.02859	*
4	Neisseria	3.18286	6.10238	0.08094	*
5	Granulicatella	5.65	5.30508	0.6837
6	Haemophilus	1.79571	3.02889	0.1482
7	Prevotella	1.61429	2.92429	0.481
8	Porphyromonas	1.76429	1.73302	0.9618
9	Leptotrichia	2.24857	1.64492	0.3815
10	Schaalia	0.835714	1.59079	0.173
11	Abiotrophia	0.79	0.805556	0.9617
12	Saccharibacteria_genera_incertae_sedis	0.815714	0.753016	0.8371
13	Actinomyces	0.29	0.634921	0.177
14	Veillonella	0.431429	0.60254	0.3275
15	Lautropia	0.438571	0.477937	0.8268
16	Parvimonas	0.495714	0.427302	0.6935
17	Unassigned	0.407143	0.416349	0.9306
18	Oribacterium	0.384286	0.409524	0.8283
19	Lancefieldella	0.19	0.40746	0.4631
20	Capnocytophaga	0.28	0.361746	0.6562
21	Eubacterium	0.541429	0.316825	0.08209	*
22	Lachnoanaerobaculum	0.38	0.328413	0.5752
23	Fusobacterium	0.332857	0.330794	0.9783
24	Chryseobacterium	0.252857	0.326032	0.8386
25	Filifactor	0.381429	0.214762	0.4095
26	Peptostreptococcus	0.267143	0.206349	0.3464
27	Treponema	0.471429	0.150794	0.02214	*
28	Aggregatibacter	0.16	0.171429	0.879
29	Stomatobaculum	0.195714	0.151429	0.5001
30	Campylobacter	0.137143	0.124762	0.7654
31	Catonella	0.08	0.077143	0.9105
32	Cardiobacterium	0.035714	0.06619	0.08431	*
33	Alloprevotella	0.074286	0.054603	0.5535
34	Tannerella	0.082857	0.053175	0.4237
35	Peptostreptococcaceae_incertae_sedis	0.068571	0.045238	0.2655
36	Selenomonas	0.034286	0.047619	0.5965
37	Megasphaera	0.015714	0.049206	0.3347
38	Aminipila	0.042857	0.044286	0.946
39	Corynebacterium	0.031429	0.044921	0.579
40	Peptococcus	0.042857	0.031429	0.4365
41	Ihubacter	0.06	0.028571	0.2103
42	Dialister	0.028571	0.029048	0.9782
43	Streptobacillus	0.034286	0.02746	0.5955
44	Solobacterium	0.025714	0.028254	0.893
45	Arachnia	0.02	0.026349	0.5936
46	Eikenella	0.018571	0.025873	0.5854
47	Kingella	0.008571	0.024921	0.1553
48	Butyrivibrio	0.005714	0.023492	0.3419
49	Shuttleworthia	0.022857	0.020952	0.8965
50	Mogibacterium	0.018571	0.020794	0.7561
51	Olsenella	0.028571	0.018571	0.3484
52	Fudania	0.018571	0.015873	0.7139
53	Pseudescherichia	0.002857	0.016349	0.6556
54	Mycoplasmopsis	0.018571	0.014444	0.869
55	Vallitalea	0.007143	0.015397	0.4397
56	Mycoplasma	0.09	0.004127	0.002668	*
57	Natranaerovirga	0.008571	0.011587	0.5662
58	Actinobaculum	0.012857	0.01	0.6688
59	Desulfobulbus	0.017143	0.009365	0.4719
60	Caviibacter	0.004286	0.010317	0.2979
61	Paraprevotella	0.002857	0.010317	0.3483
62	Moraxella	0.011429	0.009365	0.8501
63	Fretibacterium	0.014286	0.008571	0.3639
64	Klebsiella	0.005714	0.008254	0.8414
65	Bifidobacterium	0	0.008254	0.4619
66	Johnsonella	0.005714	0.007302	0.8476
67	Bulleidia	0.004286	0.006667	0.5036
68	Bacteroides	0.008571	0.006032	0.7241
69	Hespellia	0.001429	0.006032	0.4201
70	Flavobacterium	0.002857	0.005397	0.6973
71	Sporanaerobacter	0.007143	0.004921	0.7785
72	Phocaeicola	0.005714	0.004921	0.804
73	Prevotellamassilia	0.014286	0.003968	0.16416
74	Lachnospiracea_incertae_sedis	0.014286	0.003651	0.005277	*
75	Pseudoramibacter	0.022857	0.002698	0.109993
76	Metamycoplasma	0.005714	0.004603	0.8296
77	Enterobacter	0.002857	0.004444	0.6532
78	Schnuerera	0.012857	0.003175	0.1313
79	Simonsiella	0	0.004444	0.407
80	Amniculibacterium	0.001429	0.004127	0.5996
81	Scardovia	0.001429	0.00381	0.5453
82	Anaeroglobus	0.004286	0.003492	0.8792
83	Serratia	0	0.003968	0.6669
84	Ensifer	0.002857	0.003333	0.9173
85	Beduinibacterium	0.005714	0.003016	0.6612
86	Clostridium_sensu_stricto	0.002857	0.003175	0.9509
87	Lampropedia	0.005714	0.002698	0.2262
88	Schwartzia	0.004286	0.002698	0.5377
89	SR1_genera_incertae_sedis	0.001429	0.002698	0.5513
90	Desulfovibrio	0.001429	0.002381	0.7729
91	Ligilactobacillus	0	0.00254	0.4683
92	Pantoea	0.001429	0.002381	0.7374
93	Lactobacillus	0.002857	0.002222	0.8661
94	Coprococcus	0.008571	0.001587	0.14745
95	Faecalibacterium	0	0.002381	0.2419
96	Eggerthia	0	0.002381	0.4233
97	Peptoanaerobacter	0.002857	0.001746	0.548
98	Romboutsia	0.001429	0.001746	0.8888
99	Apibacter	0	0.001746	0.519
100	Acholeplasma	0.008571	0.000635	0.101487
101	Roseburia	0	0.001587	0.3899
102	Staphylococcus	0	0.001587	0.3544
103	Wolinella	0.001429	0.001429	1
104	Slackia	0.001429	0.001429	1
105	Agathobacter	0	0.001587	0.2613
106	Weissella	0.001429	0.00127	0.9169
107	Criibacterium	0.001429	0.00127	0.9299
108	Murdochiella	0.001429	0.00127	0.9576
109	Kurthia	0.001429	0.001111	0.8441
110	Kineothrix	0	0.00127	0.4683
111	Cryptobacterium	0	0.00127	0.4305
112	Raoultella	0.001429	0.000952	0.8481
113	Hungatella	0	0.001111	0.5129
114	Clostridium_IV	0.001429	0.000952	0.8481
115	Mucilaginibacter	0	0.001111	0.544
116	Citrobacter	0	0.001111	0.7036
117	Odoribacter	0.008571	0.000159	0.102935
118	Carboxylicivirga	0.001429	0.000794	0.5757
119	Howardella	0	0.000952	0.4005
120	Stenotrophomonas	0	0.000794	0.645
121	Saccharicrinis	0	0.000794	0.4465
122	Propionibacterium	0	0.000794	0.5248
123	Tessaracoccus	0.004286	0.000317	0.11017
124	Pyramidobacter	0.002857	0.000476	0.1643
125	Alloscardovia	0	0.000794	0.5773
126	Gemmiger	0	0.000794	0.5248
127	Lachnospira	0	0.000635	0.5853
128	Roseimarinus	0.001429	0.000476	0.31
129	Fannyhessea	0	0.000635	0.4995
130	Tissierella	0	0.000635	0.4995
131	Erysipelothrix	0	0.000635	0.5853
132	Enterocloster	0	0.000635	0.6751
133	Blautia	0	0.000635	0.4995
134	Bacillus	0.001429	0.000476	0.4125
135	Asteroleplasma	0.001429	0.000476	0.4125
136	Metaprevotella	0.001429	0.000476	0.4125
137	Ottowia	0	0.000635	0.7415
138	Adlercreutzia	0	0.000476	0.5618
139	Alistipes	0	0.000476	0.6561
140	Allobaculum	0	0.000476	0.7415
141	Pseudomonas	0	0.000476	0.6561
142	Endomicrobium	0	0.000476	0.6561
143	Flexilinea	0	0.000476	0.5618
144	Parabacteroides	0	0.000476	0.5618
145	Limosilactobacillus	0	0.000476	0.6561
146	Lactococcus	0	0.000476	0.5618
147	Skermanella	0	0.000317	0.7415
148	Salmonella	0	0.000317	0.6383
149	Turicibacter	0	0.000317	0.6383
150	Cutibacterium	0.001429	0.000159	0.15691
151	Bartonella	0	0.000317	0.7415
152	Comamonas	0	0.000317	0.6383
153	Gaiella	0	0.000317	0.7415
154	Syntrophomonas	0.001429	0	0.102129
155	Bergeriella	0	0.000159	0.7415
156	Arsenophonus	0	0.000159	0.7415
157	Gp4	0	0.000159	0.7415
