# Supplementary material for: Characterization of the salivary microbiome in healthy individuals under fatigue status
Source: Front Cell Infect Microbiol. 2025 May 29;15:1506723. doi: 10.3389/fcimb.2025.1506723 (PMC12159056; doi:10.3389/fcimb.2025.1506723)
Supplement: Supplementary file 7 [file Table5.xlsx]

## Sheet: pathway_errorbar
feature	method	group1	group2	adjusted p-value (q-value)	pathway_name	pathway_description	pathway_class	pathway_map
ko00563	LinDA	ENG	FTG	0.0177451	Glycosylphosphatidylinositol (GPI)-anchor biosynthesis	Cell surface proteins can be attached to the cell membrane via the glycolipid structure called glycosylphosphatidylinositol (GPI) anchor. Hundreds of GPI-anchored proteins have been identified in many eukaryotes ranging from protozoa and fungi to mammals. All protein-linked GPI anchors share a common core structure, characterized by the substructure Man (a1-4) GlcN (a1-6) myo-inositol-1P-lipid. B…	Metabolism; Glycan biosynthesis and metabolism	Glycosylphosphatidylinositol (GPI)-anchor biosynthesis
ko04146	LinDA	ENG	FTG	0.0171063	Peroxisome	Peroxisomes are essential organelles that play a key role in redox signalling and lipid homeostasis. They contribute to many crucial metabolic processes such as fatty acid oxidation, biosynthesis of ether lipids and free radical detoxification. The biogenesis of peroxisomes starts with the early peroxins PEX3, PEX16 and PEX19 and proceeds via several steps. The import of membrane proteins into pe…	Cellular Processes; Transport and catabolism	Peroxisome
ko04260	LinDA	ENG	FTG	0.0436051	Cardiac muscle contraction	Contraction of the heart is a complex process initiated by the electrical excitation of cardiac myocytes (excitation-contraction coupling, ECC). In cardiac myocytes, Ca2+ influx induced by activation of voltage-dependent L-type Ca channels (DHP receptors) upon membrane depolarization triggers the release of Ca2+ via Ca2+ release channels (ryanodine receptors) of sarcoplasmic reticulum (SR) throug…	Organismal Systems; Circulatory system	Cardiac muscle contraction
ko05142	LinDA	ENG	FTG	0.0410383	Chagas disease	Trypanosoma cruzi is an intracellular protozoan parasite that causes Chagas disease, also called American trypanosomiasis. The parasite life cycle involves hematophagous reduviid bugs as vectors. Once parasites enter the host body, they invade diverse host cells including cardiomyocytes. Establishment of infection depends on various parasite molecules such as cruzipain, oligopeptidase B, and tran…	Human Diseases; Infectious disease: parasitic	Chagas disease
ko00565	LinDA	ENG	FTG	0.0397304	Ether lipid metabolism	NA	Metabolism; Lipid metabolism	Ether lipid metabolism
ko00190	LinDA	ENG	FTG	0.0153306	Oxidative phosphorylation	NA	Metabolism; Energy metabolism	Oxidative phosphorylation
ko05322	LinDA	ENG	FTG	0.0282259	Systemic lupus erythematosus	Systemic lupus erythematosus (SLE) is a prototypic autoimmune disease characterised by the production of IgG autoantibodies that are specific for self-antigens, such as DNA, nuclear proteins and certain cytoplasmic components, in association with a diverse array of clinical manifestations. The primary pathological findings in patients with SLE are those of inflammation, vasculitis, immune complex…	Human Diseases; Immune disease	Systemic lupus erythematosus
ko04964	LinDA	ENG	FTG	0.00399497	Proximal tubule bicarbonate reclamation	One of the major tasks of the renal proximal tubule (PT) is to secrete acid into the tubule lumen, thereby reabsorbing approximately 80% of the filtered bicarbonate (HCO3(-)), as well as generating "new HCO3(-)" for regulating blood pH. In the tubular lumen, filtered HCO3(-) combines with H(+) in a reaction catalyzed by CA IV. The CO2 thus produced rapidly diffuses into the tubular cells and is c…	Organismal Systems; Excretory system	Proximal tubule bicarbonate reclamation
ko00623	LinDA	ENG	FTG	0.000244624	Toluene degradation	NA	Metabolism; Xenobiotics biodegradation and metabolism	Toluene degradation
ko05211	LinDA	ENG	FTG	9.32109e-05	Renal cell carcinoma	Renal cell cancer (RCC) accounts for ~3% of human malignancies and its incidence appears to be rising. Although most cases of RCC seem to occur sporadically, an inherited predisposition to renal cancer accounts for 1-4% of cases. RCC is not a single disease, it has several morphological subtypes. Conventional RCC (clear cell RCC) accounts for ~80% of cases, followed by papillary RCC (10-15%), chr…	Human Diseases; Cancer: specific types	Renal cell carcinoma
ko00360	LinDA	ENG	FTG	0.0094414	Phenylalanine metabolism	NA	Metabolism; Amino acid metabolism	Phenylalanine metabolism
ko00130	LinDA	ENG	FTG	0.000239764	Ubiquinone and other terpenoid-quinone biosynthesis	Ubiquinone (UQ), also called coenzyme Q, and plastoquinone (PQ) are electron carriers in oxidative phosphorylation and photosynthesis, respectively. The quinoid nucleus of ubiquinone is derived from the shikimate pathway; 4-hydroxybenzoate is directly formed from chorismate in bacteria, while it can be formed from either chorismate or tyrosine in yeast. The following biosynthesis of terpenoid moi…	Metabolism; Metabolism of cofactors and vitamins	Ubiquinone and other terpenoid-quinone biosynthesis
ko03050	LinDA	ENG	FTG	0.0440011	Proteasome	The proteasome is a protein-destroying apparatus involved in many essential cellular functions, such as regulation of cell cycle, cell differentiation, signal transduction pathways, antigen processing for appropriate immune responses, stress signaling, inflammatory responses, and apoptosis. It is capable of degrading a variety of cellular proteins in a rapid and timely fashion and most substrate …	Genetic Information Processing; Folding, sorting and degradation	Proteasome
ko05200	LinDA	ENG	FTG	0.00251466	Pathways in cancer	NA	Human Diseases; Cancer: overview	Pathways in cancer
ko05143	LinDA	ENG	FTG	0.0410567	African trypanosomiasis	Trypanosoma brucei, the parasite responsible for African trypanosomiasis (sleeping sickness), are spread by the tsetse fly in sub-Saharan Africa. The parasites are able to pass through the blood-brain barrier and cause neurological damage by inducing cytokines like TNF alpha, IFN gamma, and IL1. These cytokines and other metabolites such as nitric oxide and somnogenic prostaglandin D2 disturb cir…	Human Diseases; Infectious disease: parasitic	African trypanosomiasis
ko00401	LinDA	ENG	FTG	0.00645907	Novobiocin biosynthesis	NA	Metabolism; Biosynthesis of other secondary metabolites	Novobiocin biosynthesis
ko00960	LinDA	ENG	FTG	0.0425736	Tropane, piperidine and pyridine alkaloid biosynthesis	NA	Metabolism; Biosynthesis of other secondary metabolites	Tropane, piperidine and pyridine alkaloid biosynthesis
ko03008	LinDA	ENG	FTG	0.0411913	Ribosome biogenesis in eukaryotes	Ribosomes are the cellular factories responsible for making proteins. In eukaryotes, ribosome biogenesis involves the production and correct assembly of four rRNAs and about 80 ribosomal proteins. It requires hundreds of factors not present in the mature particle. In the absence of these proteins, ribosome biogenesis is stalled and cell growth is terminated even under optimal growth conditions. T…	Genetic Information Processing; Translation	Ribosome biogenesis in eukaryotes
ko00020	LinDA	ENG	FTG	0.0032314	Citrate cycle (TCA cycle)	The citrate cycle (TCA cycle, Krebs cycle) is an important aerobic pathway for the final steps of the oxidation of carbohydrates and fatty acids. The cycle starts with acetyl-CoA, the activated form of acetate, derived from glycolysis and pyruvate oxidation for carbohydrates and from beta oxidation of fatty acids. The two-carbon acetyl group in acetyl-CoA is transferred to the four-carbon compoun…	Metabolism; Carbohydrate metabolism	Citrate cycle (TCA cycle)
ko00340	LinDA	ENG	FTG	0.0325579	Histidine metabolism	NA	Metabolism; Amino acid metabolism	Histidine metabolism
ko00910	LinDA	ENG	FTG	0.0194756	Nitrogen metabolism	The biological process of the nitrogen cycle is a complex interplay among many microorganisms catalyzing different reactions, where nitrogen is found in various oxidation states ranging from +5 in nitrate to -3 in ammonia. The core nitrogen cycle involves four reduction pathways and two oxidation pathways. Nitrogen fixation [MD:M00175] is the process of reducing atmospheric molecular nitrogen to …	Metabolism; Energy metabolism	Nitrogen metabolism
ko00540	LinDA	ENG	FTG	0.0406187	Lipopolysaccharide biosynthesis	Lipopolysaccharide (LPS) is the major component of the outer membrane of Gram-negative bacteria consisting of three domains: a hydrophobic anchor called lipid A, a non-repeating core oligosaccharide (OS) and a repetitive glycan polymer called O-antigen or O-polysaccharide (O-PS). The enzymes for the biosynthesis of lipid A are well conserved among Gram-negative bacterial species [MD:M00060 M00866…	Metabolism; Glycan biosynthesis and metabolism	Lipopolysaccharide biosynthesis
ko04080	LinDA	ENG	FTG	0.00488735	Neuroactive ligand-receptor interaction	NA	Environmental Information Processing; Signaling molecules and interaction	Neuroactive ligand-receptor interaction
ko00944	LinDA	ENG	FTG	0.0320468	Flavone and flavonol biosynthesis	Flavones and flavonols (3-hydroxyflavones) are common flavonoids in the plant kingdom. They are synthesized as part of the flavonoid modification pathways in aglycone and glucoside forms.	Metabolism; Biosynthesis of other secondary metabolites	Flavone and flavonol biosynthesis
ko04920	LinDA	ENG	FTG	0.0105751	Adipocytokine signaling pathway	Increased adipocyte volume and number are positively correlated with leptin production, and negatively correlated with production of adiponectin.	Organismal Systems; Endocrine system	Adipocytokine signaling pathway
